# Supplementary material
Source: Springer Nature journal article supplement (https://www.springermedizin.de/resource/supplementary/12931_2010_1044_MOESM4_ESM.pdf/9425512)

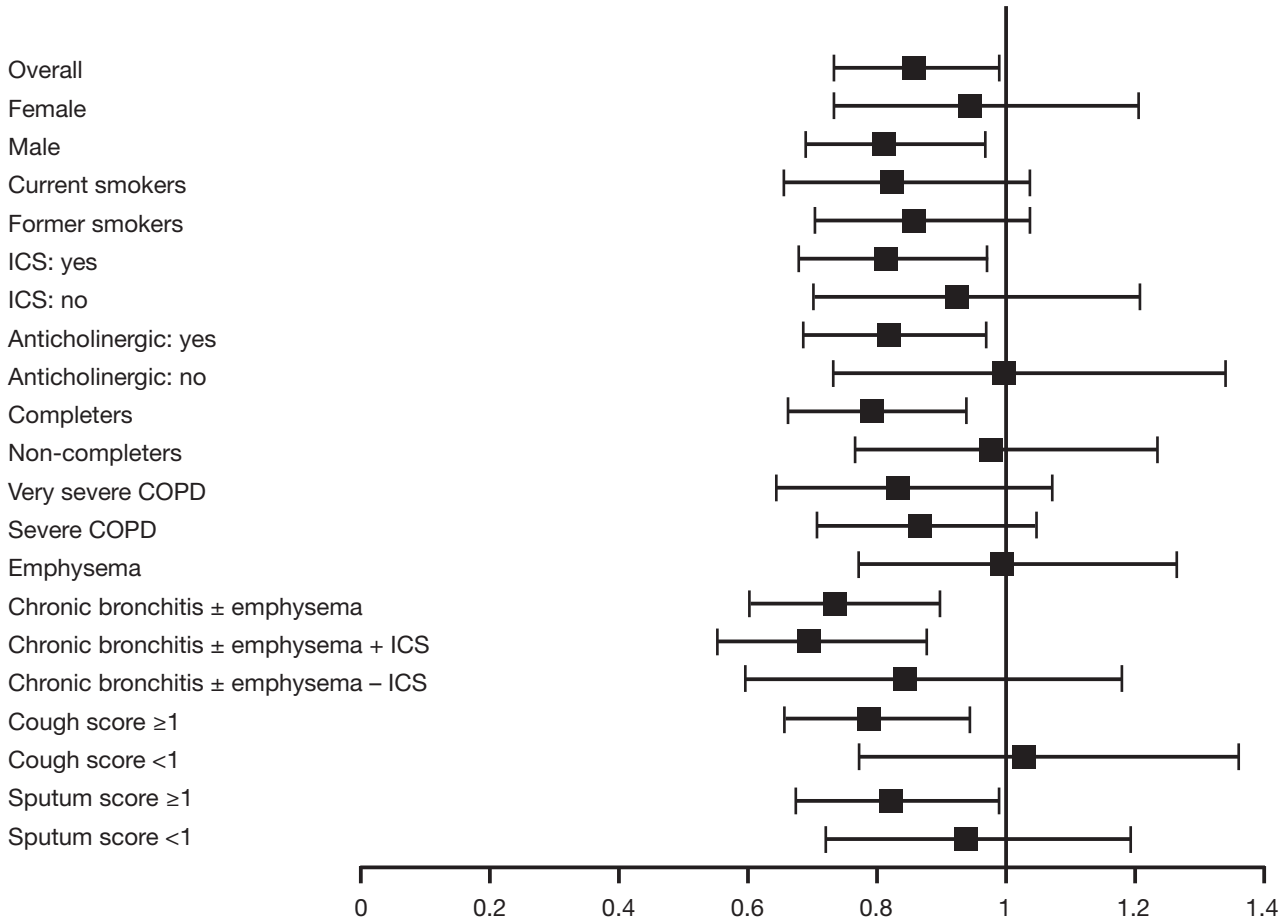

Favors roflumilast

Favors placebo

Supplement: MOESM4 [file 9425512]
